# Supplementary material for: Development of immunohistochemistry and in situ hybridisation for the detection of SARS-CoV and SARS-CoV-2 in formalin-fixed paraffin-embedded specimens
Source: PubMed Central journal article supplement (PMC7736337; doi:10.1038/s41598-020-78949-0), 2020-12-14
Supplement: 41598_2020_78949_MOESM1_ESM.pdf [file 41598_2020_78949_MOESM1_ESM.pdf]

# **Development of Immunohistochemistry and *In Situ* Hybridisation for the Detection of SARS-CoV and SARS-CoV-2 in Formalin-Fixed Paraffin-Embedded Specimens**

**Fabian Z. X. Lean<sup>1\*</sup>, Mart M. Lamers<sup>2</sup>, Samuel P. Smith<sup>3,7</sup>, Rebecca Shipley<sup>3,6</sup>, Debby Schipper<sup>2</sup>, Nigel Temperton<sup>4</sup>, Bart L. Haagmans<sup>2</sup>, Ashley C. Banyard<sup>3</sup>, Kevin R. Bewley<sup>5</sup>, Miles W. Carroll<sup>5</sup>, Sharon M. Brookes<sup>3</sup>, Ian Brown<sup>3</sup>, Alejandro Nuñez<sup>1</sup>**

<sup>1</sup> Pathology Department, Animal and Plant Health Agency (APHA), Woodham Lane, New Haw, Addlestone, KT15 3NB, United Kingdom

<sup>2</sup> Department of Viroscience, Erasmus Medical Centre, Rotterdam, Netherlands

<sup>3</sup> Virology Department, Animal and Plant Health Agency (APHA), Woodham Lane, New Haw, Addlestone, KT15 3NB, United Kingdom

<sup>4</sup> Viral Pseudotype Unit, Medway School of Pharmacy, Universities of Greenwich and Kent at Medway, Chatham ME4 4TB, United Kingdom

<sup>5</sup> National Infection Service, Public Health England, Porton Down, Salisbury, SP4 0JG, United Kingdom

<sup>6</sup> School of Life Sciences, University of Sussex, Falmer, Brighton, BN1 9QG, United Kingdom

<sup>7</sup> Institute for Infection and Immunity, St George's Hospital Medical School, University of London, London, SW17 0RE, United Kingdom.

\*Corresponding author: [Fabian.lean@apha.gov.uk](mailto:Fabian.lean@apha.gov.uk)

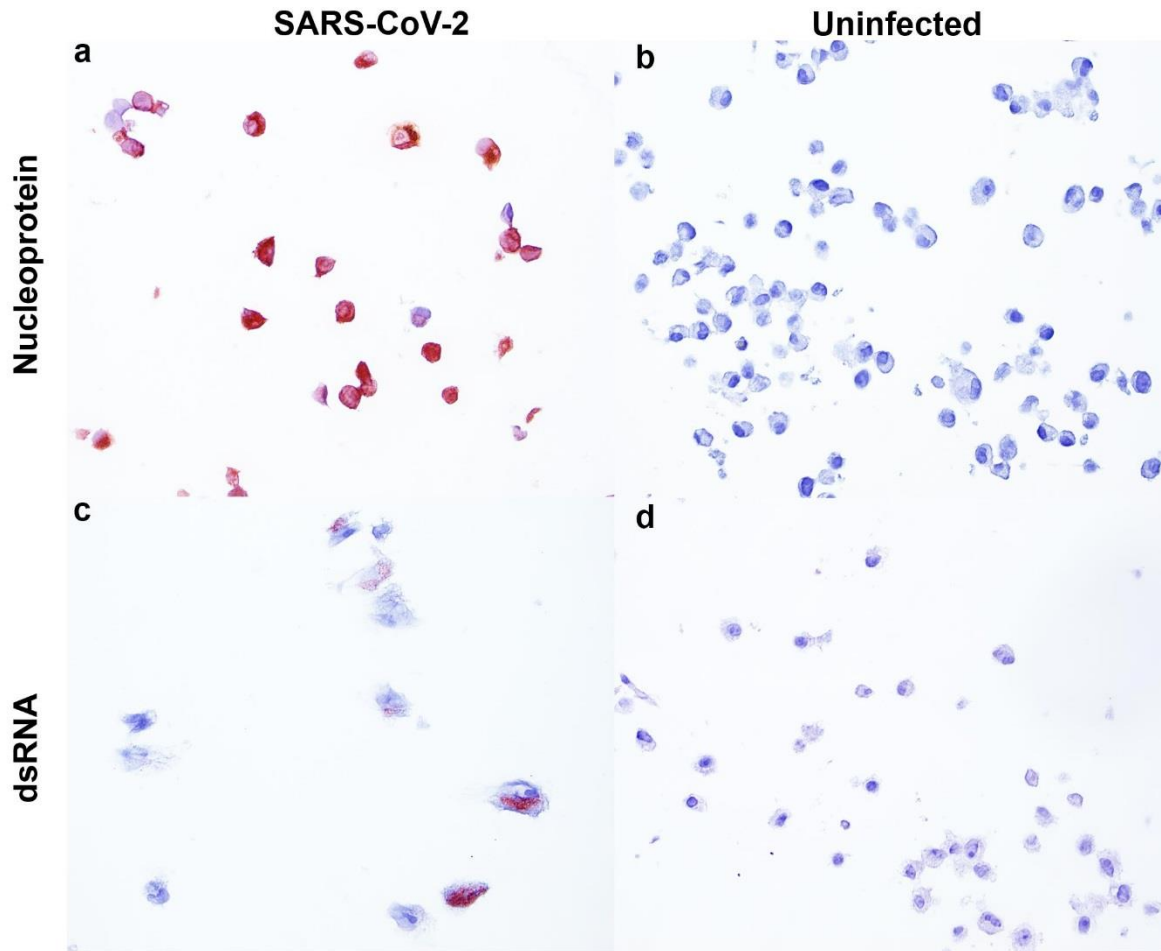

**Supplementary Figure 1. Immunohistochemical labelling of FFPE SARS-CoV-2 infected cells and uninfected cells.** Immunodetection performed using SARS-CoV nucleoprotein rabbit polyclonal antibody (a, b) and double-stranded RNA (dsRNA) mouse monoclonal antibody (c, d) in Erasmus Medical Centre, Rotterdam. Aminoethyl carbazole (AEC) was used as the chromogen (red). Original magnification 100x.
